# Supplementary material
Source: PubMed Central journal article supplement (PMC4271069)

## Figure legend - Supplementary Figure 1

**Supplementary Figure 1. Alignments of 10 *pfs230* and 12 *pfg377* protein sequences obtained by PCR amplification of the respective genes from single-clone infected PNG field isolates.** Sequencing by direct Sanger sequencing in one direction with nested PCR reverse primer of *pfs230* and in both directions with nested PCR forward and reverse primers of *pfg377*. *pfs230* nested PCR forward primer was found to be not suitable for sequencing. **A.** Protein sequence alignments of *pfs230* (left panel) and *pfg377* (right panel). Combination of two polymorphic regions resulted in increased marker diversity. 3D7 strain protein sequences derive from PlasmoDB: *pfs230*, PF3D7\_0209000 and *pfg377*, PF3D7\_1250100. **B.** Comparison of fragment sizes measured by capillary electrophoresis with sizes obtained by Sanger sequencing of the same isolates. Fragment sizes were underestimated by CE when compared to Sanger sequencing, which would be explained by the fact that the sized fragments were larger than the largest fragment (500 bp) of the GS500LIZ size standard (Applied Biosystems). The underestimation was less pronounced for *Pfs230* due to smaller PCR fragments.



## Figure Legend - Supplementary Figure 2

### **Supplementary Figure 2. Comparison of fragment sizes obtained by using two different capillary electrophoresis (CE) size standards applied to 38 *pfg377* amplicons detected in 13 blood samples.**

To investigate whether a size standard containing fragments up to 1200 bp would provide more accurate *pfg377* fragment sizing, a subset of 13 samples was simultaneously sized by CE for *pfg377* using either the GS500LIZ or the GS1200LIZ (Applied Biosystems). **A.** Distribution of amplicon sizes by using GS500LIZ (left panel) or GS1200LIZ (right panel). Better resolution, especially in the size range over 600 bp, was obtained for GS1200LIZ. **B.** Difference of sizes by GS500LIZ minus sizes by GS1200LIZ plotted over the amplicon size of GS500LIZ. Curve shows a polynomial equation:  $y = -5E-06x^3 + 0.0083x^2 - 4.1946x + 689.48$ . A non-linear overestimation of size by GS500LIZ was found. This leads to the conclusion that GS500LIZ size standard is sufficient for *pfs230*, as amplicons are <600 bp. For *pfg377* with amplicons >700 bp the GS1200 size standard provides improved sizing.

**A****GS500LIZ**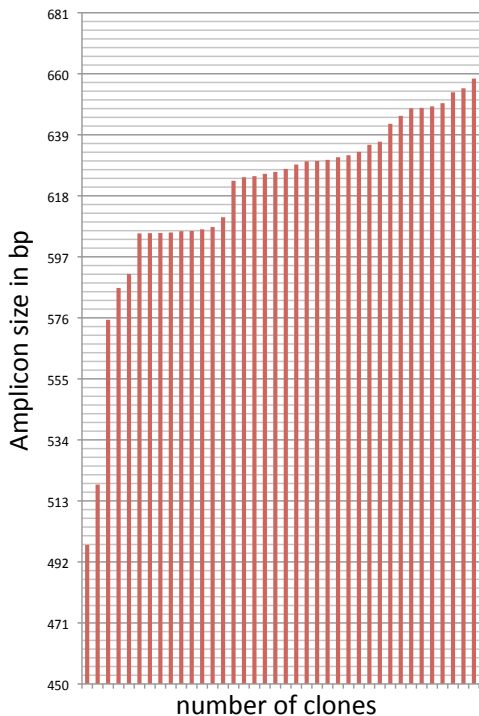**GS1200LIZ**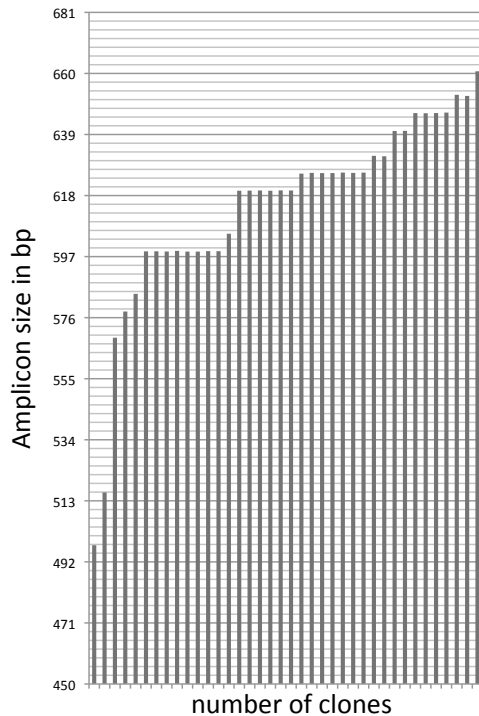**B**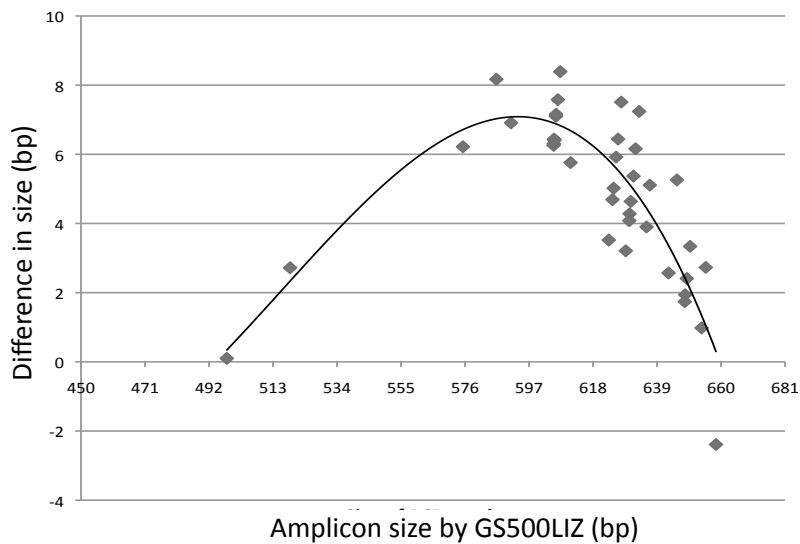

Supplement: supp_jiu236_jiu236supp.pdf [file supp_jiu236_jiu236supp.pdf]
